# Supplementary material for: Prognostic Significance of CHIP and RIPK3 in Non-Small Cell Lung Cancer
Source: PubMed Central journal article supplement (PMC7352347; doi:10.3390/cancers12061496), 2020-06-08
Supplement: cancers-12-01496-s001.pdf [file cancers-12-01496-s001.pdf]

*Supplementary materials*

## **Prognostic Significance of CHIP and RIPK3 in Non-Small Cell Lung Cancer**

**Jisup Kim**<sup>1</sup>, **Joon-Yong Chung**<sup>2</sup>, **Young Soo Park**<sup>1</sup>, **Se Jin Jang**<sup>1,3</sup>, **Hyeong Ryul Kim**<sup>4</sup>, **Chang-Min Choi**<sup>5,6,\*</sup> and **Joon Seon Song**<sup>1,\*</sup>

<sup>1</sup> Department of Pathology, Asan Medical Center, University of Ulsan College of Medicine, Seoul 05505, Korea; jspath@amc.seoul.kr (J.K.), youngspark@amc.seoul.kr (Y.S.P.), jangsejin@amc.seoul.kr (S.J.J.)

<sup>2</sup> Experimental Pathology Laboratory, Laboratory of Pathology, Center for Cancer Research, National Cancer Institute, National Institutes of Health, Bethesda, MD 20892, USA; chungjo@mail.nih.gov

<sup>3</sup> Center for Cancer Genome Discovery, Asan Medical Center, Asan Institute for Life Sciences, Seoul 05505, Korea

<sup>4</sup> Department of Thoracic and Cardiovascular Surgery, Asan Medical Center, University of Ulsan College of Medicine, Seoul 05505, Korea; drhrkim10@gmail.com

<sup>5</sup> Department of Pulmonology and Critical Care Medicine, Asan Medical Center, University of Ulsan, College of Medicine, Seoul 05505, Korea

<sup>6</sup> Department of Oncology, Asan Medical Center, University of Ulsan, College of Medicine, Seoul 05505, Korea

\* Correspondence: ccm9607@gmail.com (C.-M.C.); songjs@amc.seoul.kr (J.S.S.); Tel.: +82-2-3010-5902 (C.-M.C.); +82-2-3010-4548 (J.S.S.)

**Table S1.** Univariate Cox regression analysis for overall survival and disease-free survival in subgroups according to histology.

| Variable                                    | Overall survival    |              | Disease-free survival |              |
|---------------------------------------------|---------------------|--------------|-----------------------|--------------|
|                                             | HR (95% CI)         | <i>p</i>     | HR (95% CI)           | <i>p</i>     |
| <b>Adenocarcinoma</b>                       |                     |              |                       |              |
| CHIP expression (+ vs. -)                   | 0.669 (0.305–1.467) | 0.316        | 1.176 (0.673–2.056)   | 0.568        |
| RIPK3 expression (+ vs. -)                  | 1.864 (1.035–3.360) | <b>0.038</b> | 1.775 (1.051–2.999)   | <b>0.032</b> |
| CHIP(-)/RIPK3(+) (vs. Others <sup>c</sup> ) | 2.096 (1.234–3.561) | <b>0.006</b> | 1.456 (0.936–2.267)   | 0.096        |
| <b>Squamous cell carcinoma</b>              |                     |              |                       |              |
| CHIP expression (+ vs. -)                   | 0.531 (0.244–1.154) | 0.110        | 0.689 (0.306–1.551)   | 0.368        |
| RIPK3 expression (+ vs. -)                  | 1.298 (0.556–3.030) | 0.547        | 1.142 (0.447–2.920)   | 0.781        |
| CHIP(-)/RIPK3(+) (vs. Others <sup>a</sup> ) | 1.686 (0.884–3.215) | 0.113        | 0.689 (0.306–1.551)   | 0.368        |

CHIP(+) and RIPK3(+) denote highly positive expression in immunohistochemistry, while CHIP(-) and RIPK3(-) denote negative-to-weakly positive expression. <sup>a</sup> Others consisted of 83 CHIP(+)/RIPK3(+), 6 CHIP(+)/RIPK3(-), and 84 CHIP(-)/RIPK3(-) cases. CI, confidence interval; HR, hazard ratio.

**Table S2.** Clinicopathologic features of the study population and their associations with the combination groups according to CHIP and RIPK3.

| Clinicopathologic variables | All (n=404) | CHIP(-)/RIPK3(+) (n=231) | Others <sup>c</sup> (n=173) | p      |
|-----------------------------|-------------|--------------------------|-----------------------------|--------|
| Age                         |             |                          |                             |        |
| < 65 yrs                    | 245 (60.6%) | 105 (60.7%)              | 140 (60.6%)                 | 0.986  |
| ≥ 65 yrs                    | 159 (39.4%) | 68 (39.3%)               | 91 (39.4%)                  |        |
| Gender                      |             |                          |                             |        |
| Male                        | 283 (70.0%) | 157 (68.0%)              | 126 (72.8%)                 | 0.291  |
| Female                      | 121 (30.0%) | 74 (32.0%)               | 47 (27.2%)                  |        |
| Smoking                     |             |                          |                             |        |
| No smoking history          | 146 (36.1%) | 89 (38.5%)               | 57 (32.9%)                  | 0.248  |
| Smoking history             | 258 (63.9%) | 142 (61.5%)              | 116 (67.1%)                 |        |
| Operation type              |             |                          |                             |        |
| Lobectomy                   | 348 (86.1%) | 198 (85.7%)              | 150 (86.7%)                 | 0.461  |
| Bilobectomy                 | 26 (6.4%)   | 17 (7.4%)                | 9 (5.2%)                    |        |
| Pneumonectomy               | 25 (6.2%)   | 12 (5.2%)                | 13 (7.5%)                   |        |
| Others <sup>a</sup>         | 5 (1.2%)    | 4 (1.7%)                 | 1 (0.6%)                    |        |
| Stage                       |             |                          |                             |        |
| I                           | 177 (43.8%) | 86 (37.2%)               | 91 (52.6%)                  | 0.002  |
| II–III                      | 227 (56.2%) | 145 (62.8%)              | 82 (47.4%)                  |        |
| Histology                   |             |                          |                             |        |
| Adenocarcinoma              | 247 (61.1%) | 147 (63.6%)              | 100 (57.8%)                 | 0.398  |
| Squamous cell carcinoma     | 146 (36.1%) | 77 (33.3%)               | 69 (39.9%)                  |        |
| Other types <sup>b</sup>    | 11 (2.7%)   | 7 (3.0%)                 | 4 (2.3%)                    |        |
| Grade                       |             |                          |                             |        |
| 1                           | 86 (21.9%)  | 48 (21.2%)               | 38 (22.8%)                  | 0.719  |
| 2–3                         | 307 (76.0%) | 178 (78.8%)              | 129 (77.2%)                 |        |
| Adjuvant therapy            |             |                          |                             |        |
| Not performed               | 217 (53.7%) | 105 (45.5%)              | 112 (64.7%)                 | <0.001 |
| Performed                   | 187 (46.3%) | 126 (54.5%)              | 61 (35.3%)                  |        |

CHIP(+) and RIPK3(+) denote highly positive expression in immunohistochemistry, while CHIP(-) and RIPK3(-) denote negative-to-weakly positive expression. <sup>a</sup>Other operation types include 2 lobectomies with wedge resection, 2 segmentectomies, and 1 wedge resection. <sup>b</sup>Other histology includes 4 adenosquamous carcinomas, 3 large-cell carcinomas, 2 sarcomatoid carcinomas, and 2 carcinoid tumors. <sup>c</sup>Others consisted of 83 CHIP(+)/RIPK3(+), 6 CHIP(+)/RIPK3(-), and 84 CHIP(-)/RIPK3(-) cases.

**Table S3.** Univariate Cox regression analysis for overall survival and disease-free survival according to the four marker combination groups by CHIP and RIPK3 expression.

| Variable         | Overall survival    |              | Disease-free survival |              |
|------------------|---------------------|--------------|-----------------------|--------------|
|                  | HR (95% CI)         | <i>p</i>     | HR (95% CI)           | <i>p</i>     |
| CHIP(-)/RIPK3(+) | 1                   | -            | 1                     | -            |
| CHIP(+)/RIPK3(-) | 0.397 (0.055–2.856) | 0.359        | 0.777 (0.191–3.166)   | 0.725        |
| CHIP(+)/RIPK3(+) | 0.490 (0.277–0.866) | <b>0.014</b> | 0.682 (0.420–1.106)   | 0.121        |
| CHIP(-)/RIPK3(-) | 0.514 (0.315–0.840) | <b>0.008</b> | 0.592 (0.366–0.957)   | <b>0.033</b> |

CHIP(+) and RIPK3(+) denote highly positive expression in immunohistochemistry, while CHIP(-) and RIPK3(-) denote negative-to-weakly positive expression.

**Table S4.** Multivariate Cox regression analysis on overall survival and disease-free survival according to the four marker combination groups by CHIP and RIPK3 expression.

| Variable                                      | Overall survival     |                   | Disease-free survival |                   |
|-----------------------------------------------|----------------------|-------------------|-----------------------|-------------------|
|                                               | HR (95% CI)          | <i>p</i>          | HR (95% CI)           | <i>p</i>          |
| Age ≥ 65 (vs. < 65)                           | 1.457 (0.932–2.278)  | 0.098             | -                     | -                 |
| Male (vs. female)                             | 1.482 (0.695–3.161)  | 0.309             | -                     | -                 |
| Smoking history (vs. no smoking history)      | 0.975 (0.482–1.971)  | 0.944             | -                     | -                 |
| Operation type                                |                      |                   |                       |                   |
| Lobectomy                                     | 1                    |                   | 1                     | -                 |
| Bilobectomy                                   | 1.047 (0.503–2.178)  | 0.903             | 1.437 (0.678–3.048)   | 0.344             |
| Pneumonectomy                                 | 1.460 (0.680–3.135)  | 0.332             | 1.121 (0.419–2.999)   | 0.820             |
| Others <sup>a</sup>                           | 7.544 (2.291–24.846) | <b>0.001</b>      | 3.012 (0.406–22.332)  | 0.281             |
| Stage II–III (vs. Stage I)                    | 7.115 (3.565–14.198) | <b>&lt; 0.001</b> | 1.674 (0.813–3.449)   | 0.162             |
| Histology                                     |                      |                   |                       |                   |
| Adenocarcinoma                                | 1                    | -                 | 1                     | -                 |
| Squamous cell carcinoma (vs. adenocarcinoma)  | 0.600 (0.361–0.997)  | <b>0.049</b>      | 0.371 (0.223–0.619)   | <b>&lt; 0.001</b> |
| Other types <sup>b</sup> (vs. adenocarcinoma) | 4.827 (1.606–14.505) | <b>0.005</b>      | 3.641 (1.033–12.829)  | <b>0.044</b>      |
| Grade 2–3 (vs. Grade 1)                       | 2.246 (1.176–4.291)  | <b>0.014</b>      | 1.680 (1.011–2.793)   | <b>0.045</b>      |
| Adjuvant therapy (+ vs. -)                    | 0.521 (0.288–0.941)  | <b>0.031</b>      | 1.528 (0.760–3.070)   | 0.234             |
| Marker combination groups                     |                      |                   |                       |                   |
| CHIP(-)/RIPK3(+)                              | 1                    | -                 | 1                     | -                 |
| CHIP(+)/RIPK3(-)                              | 0.900 (0.119–6.782)  | 0.919             | 1.289(0.305–5.441)    | 0.730             |
| CHIP(+)/RIPK3(+)                              | 0.476 (0.260–0.873)  | <b>0.017</b>      | 0.869(0.521–1.450)    | 0.591             |
| CHIP(-)/RIPK3(-)                              | 0.766 (0.444–1.323)  | 0.339             | 0.785 (0.471–1.310)   | 0.355             |

CHIP(+) and RIPK3(+) denote highly positive expression in immunohistochemistry, while CHIP(-) and RIPK3(-) denote negative-to-weakly positive expression. <sup>a</sup>Other operation types include 2 lobectomies with wedge resection, 2 segmentectomies, and 1 wedge resection. <sup>b</sup>Other histology includes 4 adenosquamous carcinomas, 3 large-cell carcinomas, 2 sarcomatoid carcinoma, and 2 carcinoid tumors. CI, confidence interval; HR, hazard ratio.
